# Supplementary material
Source: PubMed Central journal article supplement (PMC10636773)
Supplement: NIHMS1558033-supplement-1.pdf [file NIHMS1558033-supplement-1.pdf]

### Supplementary Material

Ayers, Scheiuser, Liu, & Wetherell (2012) administered the 15-item version of the ADL-H and reported (in Table 2 of their paper) the proportion of their hoarding disorder sample who had at least moderate difficulty on each of these 15 items, (i.e., ratings of 3–5 on the ADL-H). Because our Hamilton sample had similar, though dichotomously rated, assessments for each of these 15 items, we were able to compare this community agency sample to Ayers’s similarly-aged research sample using chi-square tests. The results are shown below.

#### *Frequency (%) of Impairment in Ayers et al.’s (2012) and Hamilton’s Older Adult Samples*

| ADL-H item                      | Ayers<br>N = 25 | Hamilton<br>N = 108 | $\chi^2$ (OR, 95% CI)           |
|---------------------------------|-----------------|---------------------|---------------------------------|
| 1. Prepare food                 | 9 (32.1%)       | 59 (61.5%)          | <b>7.5 (3.33, [1.28, 9.3])</b>  |
| 2. Use refrigerator             | 8 (28.6%)       | 22 (23.7%)          | 0.3 (0.78, [0.28, 2.33])        |
| 3. Use stove                    | 8 (28.6%)       | 34 (38.2%)          | 0.9 (1.54, [0.57, 4.51])        |
| 4. Use kitchen sink             | 11 (39.3%)      | 37 (38.1%)          | 0.01 (0.95, [0.37, 2.52])       |
| 5. Eat at table                 | 16 (57.1%)      | 62 (71.3%)          | 1.9 (1.85, [0.69, 4.88])        |
| 6. Move around inside the house | 17 (60.7%)      | 57 (57.0%)          | 0.1 (0.86, [0.33, 2.18])        |
| 7. Exit home quickly            | 5 (17.9%)       | 33 (32.4%)          | 2.2 (2.19, [0.72, 8.03])        |
| 8. Use toilet                   | 3 (10.7%)       | 6 (6.7%)            | 0.5 (0.60, [0.12, 3.96])        |
| 9. Use bath                     | 4 (14.3%)       | 25 (27.5%)          | 2.0 (2.26, [0.68, 9.85])        |
| 10. Use bath sink               | 4 (14.3%)       | 11 (12.2%)          | 0.1 (0.84, [0.22, 3.93])        |
| 11. Answer door quickly         | 7 (25.0%)       | 34 (33.7%)          | 0.8 (1.52, [0.55, 4.66])        |
| 12. Sit in sofa                 | 8 (28.6%)       | 31 (32.0%)          | 0.1 (1.17, [0.43, 3.43])        |
| 13. Sleep in bed                | 9 (32.1%)       | 25 (29.4%)          | 0.1 (0.88, [0.32, 2.53])        |
| 14. Do laundry                  | 7 (25.0%)       | 45 (48.4%)          | <b>4.8 (2.79, [1.02, 8.55])</b> |
| 15. Find important things       | 24 (85.7%)      | 63 (65.6%)          | <b>4.2 (0.32, [0.08, 1.05])</b> |

Note: ADL-H = Activities of Daily Living – Hoarding. Differences between samples evaluated with chi-square analysis. Bold =  $p < .05$ .
